# Supplementary material for: Apparent discrepancy of Tibetan ice core δ 18 O records may be attributed to misinterpretation of chronology
Source: Copernicus journal article supplement (doi:10.5194/tc-13-1743-2019), 2019-06-28
Supplement: Supplementary file 1 [file tc-13-1743-2019-supplement.zip]

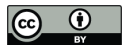

## *Supplement of*

# **Apparent discrepancy of Tibetan ice core $\delta^{18}\text{O}$ records may be attributed to misinterpretation of chronology**

**Shugui Hou et al.**

*Correspondence to:* Shugui Hou (shugui@nju.edu.cn)

- tc-13-1743-2019-supplement-title-page.pdf
- The stable oxygen isotopic measurements of the Chongce ice cores.xlsx
- tc-2018-295-supplement-version4.pdf

The copyright of individual parts of the supplement might differ from the CC BY 4.0 License.
