# Supplementary material for: Apparent discrepancy of Tibetan ice core δ 18 O records may be attributed to misinterpretation of chronology
Source: Copernicus journal article supplement (doi:10.5194/tc-13-1743-2019), 2019-06-28
Supplement: Supplementary file 1 [file The stable oxygen isotopic measurements of the Chongce ice cores.xlsx]

## Sheet: Core 3
Top Depth (m)	Bottom Depth (m)	δ18O(‰)
0	0.04375	-14.3707
0.04375	0.0875	-14.6653
0.0875	0.13125	-13.8376
0.13125	0.175	-11.9205
0.175	0.21875	-11.5063
0.21875	0.2625	-13.136
0.2625	0.30625	-13.4785
0.30625	0.35	-13.7492
0.35	0.385833	-12.3791
0.385833	0.421667	-11.7515
0.421667	0.4575	-8.25292
0.4575	0.493333	-11.9448
0.493333	0.529167	-11.382
0.529167	0.565	-11.1616
0.565	0.600833	-11.3201
0.600833	0.636667	-10.5888
0.636667	0.6725	-10.0422
0.6725	0.708333	-10.5818
0.708333	0.744167	-12.2229
0.744167	0.78	-11.9217
0.78	0.81	-8.683
0.81	0.84	-9.38803
0.84	0.87	-9.57013
0.87	0.9	-9.95513
0.9	0.93	-8.55851
0.93	0.96	-7.61889
0.96	0.99	-7.04411
0.99	1.02	-7.45183
1.02	1.05	-8.01413
1.05	1.08	-8.22215
1.08	1.11	-8.56748
1.11	1.14	-8.08063
1.14	1.17	-10.224
1.17	1.2	-9.63133
1.2	1.23	-7.68936
1.23	1.26	-9.62686
1.26	1.29	-9.56868
1.29	1.32	-8.79381
1.32	1.35105	-8.76344
1.35105	1.38211	-9.1675
1.38211	1.41316	-9.53288
1.41316	1.44421	-8.72987
1.44421	1.47526	-9.30176
1.47526	1.50632	-6.54016
1.50632	1.53737	-6.45672
1.53737	1.56842	-8.69709
1.56842	1.59947	-7.88943
1.59947	1.63053	-7.71928
1.63053	1.66158	-7.2449
1.66158	1.69263	-7.95966
1.69263	1.72368	-8.3603
1.72368	1.75474	-9.64426
1.75474	1.78579	-9.21649
1.78579	1.81684	-9.5121
1.81684	1.84789	-9.36844
1.84789	1.87895	-9.23117
1.87895	1.91	-9.08432
1.91	1.94038	-9.6366
1.94038	1.97077	-9.59797
1.97077	2.00115	-9.53476
2.00115	2.03154	-9.03716
2.03154	2.06192	-9.47137
2.06192	2.09231	-9.16272
2.09231	2.12269	-9.88364
2.12269	2.15308	-10.0632
2.15308	2.18346	-10.1573
2.18346	2.21385	-8.88173
2.21385	2.24423	-8.82292
2.24423	2.27462	-9.03176
2.27462	2.305	-8.63951
2.305	2.335	-9.1268
2.335	2.365	-10.2975
2.365	2.395	-9.77493
2.395	2.425	-8.93004
2.425	2.455	-8.68847
2.455	2.485	-6.70827
2.485	2.515	-7.85772
2.515	2.545	-7.34389
2.545	2.575	-6.97187
2.575	2.605	-6.73943
2.605	2.635	-6.70891
2.635	2.665	-5.29491
2.665	2.695	-5.82147
2.695	2.725	-5.54229
2.725	2.755	-5.89841
2.755	2.785	-6.02814
2.785	2.815	-7.23038
2.815	2.845	-8.69366
2.845	2.875	-9.6625
2.875	2.905	-11.012
2.905	2.935	-9.21502
2.935	2.965	-8.60395
2.965	2.995	-8.62606
2.995	3.025	-8.99616
3.025	3.055	-8.98975
3.055	3.085	-7.82081
3.085	3.115	-7.56318
3.115	3.145	-8.0919
3.145	3.175	-9.2743
3.175	3.205	-8.93111
3.205	3.235	-9.5018
3.235	3.265	-8.96732
3.265	3.295	-8.19668
3.295	3.325	-8.67605
3.325	3.355	-7.96437
3.355	3.385	-7.53645
3.385	3.415	-7.81519
3.415	3.445	-9.57244
3.445	3.475	-9.49601
3.475	3.505	-10.2121
3.505	3.535	-10.2664
3.535	3.565	-10.6091
3.565	3.595	-10.181
3.595	3.625	-11.1627
3.625	3.655	-10.892
3.655	3.685	-9.7603
3.685	3.71545	-10.812
3.71545	3.74591	-13.374
3.74591	3.77636	-13.102
3.77636	3.80682	-11.2963
3.80682	3.83727	-11.4872
3.83727	3.86773	-11.3363
3.86773	3.89818	-9.76277
3.89818	3.92864	-8.6742
3.92864	3.95909	-12.4786
3.95909	3.98955	-11.3267
3.98955	4.02	-10.7168
4.02	4.05	-10.6042
4.05	4.08	-11.2414
4.08	4.11	-12.1461
4.11	4.14	-10.594
4.14	4.17	-12.1858
4.17	4.2	-11.5537
4.2	4.23	-13.7178
4.23	4.26	-14.0129
4.26	4.29	-13.9435
4.29	4.32	-14.7267
4.32	4.35	-16.3111
4.35	4.38	-16.5864
4.38	4.41	-12.9451
4.41	4.44	-13.3283
4.44	4.47	-12.937
4.47	4.5	-11.5726
4.5	4.53	-11.2305
4.53	4.56	-10.754
4.56	4.59	-9.42427
4.59	4.62088	-9.29145
4.62088	4.65176	-8.99473
4.65176	4.68265	-8.57783
4.68265	4.71353	-9.03522
4.71353	4.74441	-8.28787
4.74441	4.77529	-8.98441
4.77529	4.80618	-7.86823
4.80618	4.83706	-7.78168
4.83706	4.86794	-7.42878
4.86794	4.89882	-8.10136
4.89882	4.92971	-8.75543
4.92971	4.96059	-9.2332
4.96059	4.99147	-11.0156
4.99147	5.02235	-10.6253
5.02235	5.05324	-9.3635
5.05324	5.08412	-8.96461
5.08412	5.115	-9.75664
5.115	5.14476	-9.85117
5.14476	5.17452	-9.65348
5.17452	5.20429	-10.327
5.20429	5.23405	-11.7802
5.23405	5.26381	-10.7255
5.26381	5.29357	-6.48395
5.29357	5.32333	-8.44956
5.32333	5.3531	-9.15834
5.3531	5.38286	-10.327
5.38286	5.41262	-12.8884
5.41262	5.44238	-17.4686
5.44238	5.47214	-13.764
5.47214	5.5019	-12.5644
5.5019	5.53167	-12.2287
5.53167	5.56143	-11.5189
5.56143	5.59119	-10.053
5.59119	5.62095	-9.03199
5.62095	5.65071	-10.0084
5.65071	5.68048	-13.4346
5.68048	5.71024	-13.3453
5.71024	5.74	-14.9114
5.74	5.76955	-13.8018
5.76955	5.79909	-13.5392
5.79909	5.82864	-14.3361
5.82864	5.85818	-13.9029
5.85818	5.88773	-13.6362
5.88773	5.91727	-13.6044
5.91727	5.94682	-13.5802
5.94682	5.97636	-11.5602
5.97636	6.00591	-13.1279
6.00591	6.03545	-12.1362
6.03545	6.065	-11.9245
6.065	6.09455	-11.6148
6.09455	6.12409	-11.4513
6.12409	6.15364	-11.7267
6.15364	6.18318	-10.763
6.18318	6.21273	-9.55259
6.21273	6.24227	-8.19849
6.24227	6.27182	-6.64697
6.27182	6.30136	-9.30622
6.30136	6.33091	-11.4382
6.33091	6.36045	-11.5613
6.36045	6.39	-8.83906
6.39	6.41933	-9.2307
6.41933	6.44867	-10.1816
6.44867	6.478	-10.5832
6.478	6.50733	-10.0521
6.50733	6.53667	-10.181
6.53667	6.566	-9.86223
6.566	6.59533	-10.5247
6.59533	6.62467	-11.9547
6.62467	6.654	-11.9421
6.654	6.68333	-11.1699
6.68333	6.71267	-11.365
6.71267	6.742	-12.1397
6.742	6.77133	-12.0907
6.77133	6.80067	-12.3448
6.80067	6.83	-12.3559
6.83	6.85862	-13.8041
6.85862	6.88724	-14.1835
6.88724	6.91586	-14.9978
6.91586	6.94448	-17.3769
6.94448	6.9731	-16.3457
6.9731	7.00172	-16.7139
7.00172	7.03034	-13.9788
7.03034	7.05897	-16.1937
7.05897	7.08759	-13.0624
7.08759	7.11621	-11.5314
7.11621	7.14483	-9.59914
7.14483	7.17345	-11.5943
7.17345	7.20207	-10.6524
7.20207	7.23069	-11.7101
7.23069	7.25931	-13.6009
7.25931	7.28793	-8.85299
7.28793	7.31655	-8.85362
7.31655	7.34517	-10.0759
7.34517	7.37379	-12.2536
7.37379	7.40241	-14.5786
7.40241	7.43103	-14.5512
7.43103	7.45965	-14.2877
7.45965	7.48828	-14.2315
7.48828	7.5169	-13.4902
7.5169	7.54552	-13.1725
7.54552	7.57414	-13.3052
7.57414	7.60276	-11.7845
7.60276	7.63138	-11.2569
7.63138	7.66	-10.4951
7.66	7.69083	-10.4412
7.69083	7.72167	-11.061
7.72167	7.7525	-14.3821
7.7525	7.78333	-10.8211
7.78333	7.81417	-11.8984
7.81417	7.845	-11.6237
7.845	7.87583	-11.1174
7.87583	7.90667	-11.5171
7.90667	7.9375	-13.0673
7.9375	7.96833	-11.9968
7.96833	7.99917	-10.0007
7.99917	8.03	-7.67237
8.03	8.06077	-8.15461
8.06077	8.09154	-6.6639
8.09154	8.12231	-10.8278
8.12231	8.15308	-10.7967
8.15308	8.18385	-9.77086
8.18385	8.21462	-9.84342
8.21462	8.24538	-8.92003
8.24538	8.27615	-9.08153
8.27615	8.30692	-9.88087
8.30692	8.33769	-10.3784
8.33769	8.36846	-11.0511
8.36846	8.39923	-11.4743
8.39923	8.43	-11.045
8.43	8.46	-9.21877
8.46	8.49	-9.30153
8.49	8.52	-10.5475
8.52	8.55	-10.1275
8.55	8.58	-9.48992
8.58	8.61	-7.88877
8.61	8.64	-9.62421
8.64	8.67	-9.92434
8.67	8.7	-9.64868
8.7	8.73	-12.7483
8.73	8.76	-10.8615
8.76	8.79	-11.3037
8.79	8.82	-15.4246
8.82	8.85	-15.9141
8.85	8.88	-8.1839
8.88	8.91	-7.21973
8.91	8.94	-7.32866
8.94	8.97	-7.54555
8.97	9	-9.11306
9	9.03	-9.52642
9.03	9.06	-9.30726
9.06	9.09	-10.9675
9.09	9.12	-10.7253
9.12	9.15045	-11.1627
9.15045	9.18091	-11.7485
9.18091	9.21136	-12.4404
9.21136	9.24182	-13.032
9.24182	9.27227	-11.6388
9.27227	9.30273	-11.5531
9.30273	9.33318	-11.6861
9.33318	9.36364	-11.0053
9.36364	9.39409	-12.2078
9.39409	9.42455	-11.8809
9.42455	9.455	-8.43432
9.455	9.48545	-8.24961
9.48545	9.51591	-7.97414
9.51591	9.54636	-6.99094
9.54636	9.57682	-7.00046
9.57682	9.60727	-7.22134
9.60727	9.63773	-5.66117
9.63773	9.66818	-6.79027
9.66818	9.69864	-8.33071
9.69864	9.72909	-8.85197
9.72909	9.75955	-8.68145
9.75955	9.79	-8.02664
9.79	9.81967	-7.59355
9.81967	9.84933	-5.23654
9.84933	9.879	-5.69005
9.879	9.90867	-7.53261
9.90867	9.93833	-7.22919
9.93833	9.968	-6.73905
9.968	9.99767	-6.3964
9.99767	10.0273	-7.65968
10.0273	10.057	-7.91124
10.057	10.0867	-8.02664
10.0867	10.1163	-9.52803
10.1163	10.146	-8.83979
10.146	10.1757	-11.392
10.1757	10.2053	-10.0259
10.2053	10.235	-10.1067
10.235	10.2647	-10.4063
10.2647	10.2943	-10.5389
10.2943	10.324	-10.3747
10.324	10.3537	-11.4657
10.3537	10.3833	-11.541
10.3833	10.413	-9.87328
10.413	10.4427	-9.64828
10.4427	10.4723	-10.4962
10.4723	10.502	-10.4054
10.502	10.5317	-10.17
10.5317	10.5613	-10.6961
10.5613	10.591	-10.7028
10.591	10.6207	-11.017
10.6207	10.6503	-11.5393
10.6503	10.68	-12.8613
10.68	10.7093	-12.9719
10.7093	10.7387	-11.7469
10.7387	10.768	-10.97
10.768	10.7973	-9.88378
10.7973	10.8267	-9.56983
10.8267	10.856	-9.38372
10.856	10.8853	-9.21019
10.8853	10.9147	-9.62448
10.9147	10.944	-9.54102
10.944	10.9733	-10.1199
10.9733	11.0027	-10.6421
11.0027	11.032	-10.6561
11.032	11.0613	-10.9434
11.0613	11.0907	-11.4468
11.0907	11.12	-12.8284
11.12	11.1496	-12.9492
11.1496	11.1793	-11.658
11.1793	11.2089	-10.9297
11.2089	11.2385	-9.87519
11.2385	11.2681	-9.47429
11.2681	11.2978	-9.30975
11.2978	11.3274	-9.28723
11.3274	11.357	-9.64863
11.357	11.3867	-9.53404
11.3867	11.4163	-10.2767
11.4163	11.4459	-11.2672
11.4459	11.4756	-8.45171
11.4756	11.5052	-6.82548
11.5052	11.5348	-8.6246
11.5348	11.5644	-8.95627
11.5644	11.5941	-10.0231
11.5941	11.6237	-11.6395
11.6237	11.6533	-10.9089
11.6533	11.683	-12.1083
11.683	11.7126	-12.4699
11.7126	11.7422	-12.2068
11.7422	11.7719	-12.506
11.7719	11.8015	-13.3967
11.8015	11.8311	-14.016
11.8311	11.8607	-14.8707
11.8607	11.8904	-14.0846
11.8904	11.92	-12.7969
11.92	11.9496	-12.141
11.9496	11.9792	-10.1408
11.9792	12.0087	-10.5266
12.0087	12.0383	-10.7267
12.0383	12.0679	-9.95503
12.0679	12.0975	-11.0569
12.0975	12.1271	-11.8166
12.1271	12.1567	-9.46938
12.1567	12.1862	-9.41648
12.1862	12.2158	-9.1368
12.2158	12.2454	-9.39665
12.2454	12.275	-9.28061
12.275	12.3056	-7.9073
12.3056	12.3361	-8.2268
12.3361	12.3667	-9.02658
12.3667	12.3972	-8.86942
12.3972	12.4278	-9.87898
12.4278	12.4583	-11.0334
12.4583	12.4889	-11.3181
12.4889	12.5194	-10.8862
12.5194	12.55	-11.5764
12.55	12.5806	-12.6446
12.5806	12.6111	-13.3961
12.6111	12.6417	-13.7054
12.6417	12.6722	-13.0032
12.6722	12.7028	-14.1776
12.7028	12.7333	-12.588
12.7333	12.7639	-12.2717
12.7639	12.7944	-12.3168
12.7944	12.825	-11.6569
12.825	12.8556	-11.7111
12.8556	12.8861	-11.7277
12.8861	12.9167	-12.1534
12.9167	12.9472	-12.2682
12.9472	12.9778	-12.5494
12.9778	13.0083	-12.2624
13.0083	13.0389	-11.1445
13.0389	13.0694	-7.18636
13.0694	13.1	-9.04897
13.1	13.1306	-10.6839
13.1306	13.1611	-11.3255
13.1611	13.1917	-11.8403
13.1917	13.2222	-12.4434

## Sheet: Core 2
Top Depth (m)	Bottom Depth (m)	δ18O(‰)
13.205	13.303	-16.4729
13.303	13.401	-16.8282
13.401	13.499	-13.966
13.499	13.597	-15.9937
13.597	13.695	-12.062
13.695	13.795	-8.25428
13.795	13.895	-10.4732
13.895	13.995	-10.8181
13.995	14.095	-12.5293
14.095	14.195	-11.5185
14.195	14.295	-11.3402
14.295	14.395	-9.87347
14.395	14.495	-9.86766
14.495	14.5938
14.5938	14.6925
14.6925	14.7913
14.7913	14.89
14.89	14.9888
14.9888	15.0875
15.0875	15.1863
15.1863	15.285
15.285	15.382	-12.0222
15.382	15.479	-13.6179
15.479	15.576	-11.6767
15.576	15.673	-11.5426
15.673	15.77	-11.5916
15.77	15.865	-12.1063
15.865	15.96	-12.0056
15.96	16.055	-12.2464
16.055	16.1494	-11.7655
16.1494	16.2438	-9.59658
16.2438	16.3381	-9.63107
16.3381	16.4325	-9.80059
16.4325	16.5269	-9.36134
16.5269	16.6213	-9.62782
16.6213	16.7156	-9.04346
16.7156	16.81	-9.29659
16.81	16.9167	-13.5114
16.9167	17.0233	-14.8408
17.0233	17.13	-11.6327
17.13	17.24	-12.0485
17.24	17.35	-10.708
17.35	17.46	-12.7038
17.46	17.5557	-14.4091
17.5557	17.6514	-12.6658
17.6514	17.7471	-13.5726
17.7471	17.8429	-13.2228
17.8429	17.9386	-10.0544
17.9386	18.0343	-10.7045
18.0343	18.13	-9.92455
18.13	18.23	-10.9114
18.23	18.33	-13.0367
18.33	18.43	-13.9186
18.43	18.53	-13.1865
18.53	18.63	-12.8832
18.63	18.73	-11.6894
18.73	18.83	-10.9017
18.83	18.93	-10.0174
18.93	19.0283	-10.5678
19.0283	19.1267	-12.2453
19.1267	19.225	-12.9114
19.225	19.3233	-11.0739
19.3233	19.4217	-11.1912
19.4217	19.52	-12.8677
19.52	19.6258	-11.9204
19.6258	19.7317	-14.4476
19.7317	19.8375	-19.3908
19.8375	19.9433	-19.1476
19.9433	20.0492	-14.4871
20.0492	20.155	-11.5589
20.155	20.2564	-10.9963
20.2564	20.3579	-11.7853
20.3579	20.4593	-14.7536
20.4593	20.5607	-15.9891
20.5607	20.6621	-14.9579
20.6621	20.7636	-12.2766
20.7636	20.865	-10.9999
20.865	20.9621	-10.529
20.9621	21.0593	-11.1878
21.0593	21.1564	-10.8242
21.1564	21.2536	-10.725
21.2536	21.3507	-12.6274
21.3507	21.4479	-9.26054
21.4479	21.545	-10.8565
21.545	21.645	-15.0456
21.645	21.745	-14.4113
21.745	21.845	-13.0294
21.845	21.945	-18.3455
21.945	22.045	-17.1193
22.045	22.145	-18.169
22.145	22.245	-16.0869
22.245	22.345	-14.7695
22.345	22.445	-11.8571
22.445	22.545	-11.6611
22.545	22.645	-13.3221
22.645	22.745	-13.8406
22.745	22.845	-13.0119
22.845	22.945	-13.7808
22.945	23.055	-14.4282
23.055	23.165	-15.6498
23.165	23.275	-13.2491
23.275	23.3788	-15.639
23.3788	23.4825	-15.1544
23.4825	23.5863	-12.7612
23.5863	23.69	-13.9822
23.69	23.7838	-12.4793
23.7838	23.8775	-18.2441
23.8775	23.9713	-12.5582
23.9713	24.065	-12.1296
24.065	24.1588	-14.1296
24.1588	24.2525	-12.0936
24.2525	24.3463	-12.956
24.3463	24.44	-11.7763
24.44	24.535	-12.4953
24.535	24.63	-11.8781
24.63	24.725	-12.9636
24.725	24.82	-12.2167
24.82	24.92	-11.6064
24.92	25.02	-12.3984
25.02	25.12	-14.0565
25.12	25.22	-11.0884
25.22	25.32	-11.793
25.32	25.4188	-13.1519
25.4188	25.5175	-12.8727
25.5175	25.6163	-12.1202
25.6163	25.715	-16.7173
25.715	25.8164	-15.5405
25.8164	25.9179	-15.2865
25.9179	26.0193	-12.511
26.0193	26.1207	-14.1051
26.1207	26.2221	-11.4933
26.2221	26.3236	-11.475
26.3236	26.425	-11.0273
26.425	26.525	-11.5459
26.525	26.625	-14.3293
26.625	26.725	-12.7406
26.725	26.825	-12.3448
26.825	26.925	-15.1358
26.925	27.0237	-16.7462
27.0237	27.1225	-16.3821
27.1225	27.2212	-15.1375
27.2212	27.32	-16.6825
27.32	27.4187	-14.2198
27.4187	27.5175	-11.0077
27.5175	27.6162	-12.4477
27.6162	27.715	-13.2076
27.715	27.8179	-16.6616
27.8179	27.9207	-10.9599
27.9207	28.0236	-12.1277
28.0236	28.1264	-11.4084
28.1264	28.2293	-11.7993
28.2293	28.3321	-11.4652
28.3321	28.435	-10.4148
28.435	28.5361	-10.9809
28.5361	28.6372	-10.536
28.6372	28.7383	-11.8542
28.7383	28.8394	-10.9331
28.8394	28.9406	-9.56045
28.9406	29.0417	-9.34212
29.0417	29.1428	-9.65261
29.1428	29.2439	-10.0288
29.2439	29.345	-8.31096
29.345	29.452	-10.4804
29.452	29.559	-12.3898
29.559	29.666	-10.8618
29.666	29.773	-11.4328
29.773	29.88	-12.1338
29.88	29.986	-12.8927
29.986	30.092	-11.0076
30.092	30.198	-12.9736
30.198	30.304	-13.8754
30.304	30.41	-12.9417
30.41	30.51	-11.7267
30.51	30.61	-12.3707
30.61	30.718	-10.1114
30.718	30.826	-10.5261
30.826	30.934	-12.3335
30.934	31.042	-12.582
31.042	31.15	-15.5304
31.15	31.249	-15.0282
31.249	31.348	-12.6949
31.348	31.447	-11.7313
31.447	31.546	-10.8671
31.546	31.645	-11.8863
31.645	31.74	-10.3839
31.74	31.835	-7.88739
31.835	31.93	-10.2179
31.93	32.025	-12.4233
32.025	32.12	-13.6128
32.12	32.215	-13.2484
32.215	32.3164	-12.119
32.3164	32.4179	-11.7377
32.4179	32.5193	-12.2348
32.5193	32.6207	-11.5463
32.6207	32.7221	-11.2513
32.7221	32.8236	-12.6719
32.8236	32.925	-15.0787
32.925	33.019	-15.9056
33.019	33.113	-15.4745
33.113	33.207	-14.6781
33.207	33.301	-13.8283
33.301	33.395	-12.1682
33.395	33.5007	-14.4803
33.5007	33.6064	-11.3989
33.6064	33.7121	-11.5739
33.7121	33.8179	-12.7019
33.8179	33.9236	-14.9405
33.9236	34.0293	-14.5907
34.0293	34.135	-11.5949
34.135	34.2386	-11.7218
34.2386	34.3421	-14.5876
34.3421	34.4457	-13.1917
34.4457	34.5493	-13.9948
34.5493	34.6529	-12.8391
34.6529	34.7564	-13.847
34.7564	34.86	-14.0106
34.86	34.96	-14.7673
34.96	35.06	-13.7382
35.06	35.16	-14.67
35.16	35.26	-12.3664
35.26	35.36	-15.9326
35.36	35.46	-17.1369
35.46	35.56	-11.7901
35.56	35.66	-11.5405
35.66	35.76	-13.0095
35.76	35.859	-13.8541
35.859	35.958	-11.9073
35.958	36.057	-12.6292
36.057	36.156	-11.8068
36.156	36.255	-12.9412
36.255	36.36	-14.0656
36.36	36.465	-13.3151
36.465	36.57	-13.5052
36.57	36.675	-12.8705
36.675	36.78	-13.7302
36.78	36.885	-12.0479
36.885	36.977	-10.681
36.977	37.069	-12.7853
37.069	37.161	-12.3409
37.161	37.253	-10.478
37.253	37.345	-11.2824
37.345	37.45	-10.7994
37.45	37.555	-11.6825
37.555	37.66	-13.0472
37.66	37.765	-13.221
37.765	37.87	-13.4389
37.87	37.975	-10.5712
37.975	38.082	-14.4404
38.082	38.189	-15.1072
38.189	38.296	-14.8017
38.296	38.403	-13.5868
38.403	38.51	-8.94009
38.51	38.62	-8.33963
38.62	38.73	-8.0975
38.73	38.84	-9.06536
38.84	38.95	-10.32
38.95	39.0586	-12.6326
39.0586	39.1671	-13.396
39.1671	39.2757	-11.75
39.2757	39.3843	-11.8774
39.3843	39.4929	-10.62
39.4929	39.6014	-14.3293
39.6014	39.71	-12.0506
39.71	39.8233	-11.6336
39.8233	39.9367	-13.1636
39.9367	40.05	-14.9303
40.05	40.16	-11.8161
40.16	40.27	-12.9247
40.27	40.38	-14.2145
40.38	40.49	-13.415
40.49	40.6	-15.0183
40.6	40.6933	-13.8703
40.6933	40.7867	-12.834
40.7867	40.88	-11.2177
40.88	40.9733	-15.613
40.9733	41.0667	-18.3864
41.0667	41.16	-10.9782
41.16	41.2614	-10.1431
41.2614	41.3629	-10.7518
41.3629	41.4643	-12.5729
41.4643	41.5657	-7.91899
41.5657	41.6671	-11.6674
41.6671	41.7686	-11.5329
41.7686	41.87	-10.6927
41.87	41.96	-10.7111
41.96	42.05	-11.7121
42.05	42.14	-11.1524
42.14	42.23	-10.158
42.23	42.32	-13.9179
42.32	42.4137	-17.0961
42.4137	42.5075	-16.9688
42.5075	42.6012	-15.0839
42.6012	42.695	-10.7065
42.695	42.7887	-10.7696
42.7887	42.8825	-11.2159
42.8825	42.9762	-12.3938
42.9762	43.07	-11.1971
43.07	43.175	-12.2543
43.175	43.28	-12.0879
43.28	43.385	-11.7252
43.385	43.49	-11.0449
43.49	43.595	-8.21593
43.595	43.7	-9.54211
43.7	43.805	-10.1508
43.805	43.898	-11.5759
43.898	43.991	-12.3192
43.991	44.084	-17.593
44.084	44.177	-19.3964
44.177	44.27	-17.7875
44.27	44.3644	-17.9995
44.3644	44.4587	-13.2241
44.4587	44.5531	-14.5917
44.5531	44.6475	-14.8508
44.6475	44.7419	-15.4105
44.7419	44.8362	-14.9863
44.8362	44.9306	-16.4574
44.9306	45.025	-15.5407
45.025	45.132	-17.773
45.132	45.239	-15.8244
45.239	45.346	-13.5271
45.346	45.453	-14.5324
45.453	45.56	-13.0089
45.56	45.6467	-12.0547
45.6467	45.7333	-12.4596
45.7333	45.82	-12.6525
45.82	45.9117	-13.4042
45.9117	46.0033	-12.3942
46.0033	46.095	-10.586
46.095	46.1867	-8.80094
46.1867	46.2783	-8.3531
46.2783	46.37	-8.99117
46.37	46.4775	-8.78542
46.4775	46.585	-11.5019
46.585	46.6925	-9.74947
46.6925	46.8	-10.1511
46.8	46.8917	-12.5888
46.8917	46.9833	-10.7455
46.9833	47.075	-11.0652
47.075	47.1667	-11.0646
47.1667	47.2583	-10.5768
47.2583	47.35	-11.168
47.35	47.448	-14.8164
47.448	47.546	-15.3924
47.546	47.644	-13.7113
47.644	47.742	-13.6628
47.742	47.84	-16.8282
47.84	47.9443	-14.6619
47.9443	48.0486	-13.5541
48.0486	48.1529	-11.5379
48.1529	48.2571	-12.1229
48.2571	48.3614	-12.2446
48.3614	48.4657	-12.9126
48.4657	48.57	-16.6474
48.57	48.6567	-9.54008
48.6567	48.7433	-7.99657
48.7433	48.83	-9.63447
48.83	48.9237	-9.86348
48.9237	49.0175	-10.1935
49.0175	49.1112	-11.8703
49.1112	49.205	-13.5837
49.205	49.2987	-11.6121
49.2987	49.3925	-13.1399
49.3925	49.4862	-13.9356
49.4862	49.58	-15.3871
49.58	49.67
49.67	49.76
49.76	49.85
49.85	49.94
49.94	50.04	-9.35488
50.04	50.14
50.14	50.24
50.24	50.3425	-15.2806
50.3425	50.445	-14.1687
50.445	50.5475	-12.4478
50.5475	50.65	-12.8053
50.65	50.7525	-12.6872
50.7525	50.855	-12.4157
50.855	50.953	-11.9075
50.953	51.051	-12.3238
51.051	51.149	-11.7984
51.149	51.247	-11.2786
51.247	51.345	-10.6902
51.345	51.4433	-8.50162
51.4433	51.5417	-9.85763
51.5417	51.64	-9.61524
51.64	51.7383	-12.1777
51.7383	51.8367	-14.7414
51.8367	51.935	-13.027
51.935	52.0307	-13.0198
52.0307	52.1264	-12.5708
52.1264	52.2221	-12.5245
52.2221	52.3179	-14.3979
52.3179	52.4136	-14.191
52.4136	52.5093	-13.4218
52.5093	52.605	-12.377
52.605	52.7125	-16.7255
52.7125	52.82	-16.9262
52.82	52.9275	-19.1112
52.9275	53.035	-15.4663
53.035	53.135	-13.2132
53.135	53.235	-14.5693
53.235	53.335	-15.2357
53.335	53.435	-14.8377
53.435	53.5283	-15.419
53.5283	53.6217	-14.9694
53.6217	53.715	-9.96273
53.715	53.8083	-12.6733
53.8083	53.9017	-12.2673
53.9017	53.995	-12.5813
53.995	54.085	-16.5941
54.085	54.175	-16.2818
54.175	54.265	-16.5424
54.265	54.355	-12.7059
54.355	54.445	-13.6047
54.445	54.535	-16.4317
54.535	54.633	-12.6744
54.633	54.731	-12.6976
54.731	54.829	-15.1364
54.829	54.927	-16.434
54.927	55.025	-13.9535
55.025	55.1262	-12.8259
55.1262	55.2275	-17.7359
55.2275	55.3287	-14.9882
55.3287	55.43	-13.9163
55.43	55.5312	-14.1338
55.5312	55.6325	-15.0687
55.6325	55.7337	-14.103
55.7337	55.835	-14.9338
55.835	55.93	-16.9253
55.93	56.025	-14.9418
56.025	56.12	-7.77999
56.12	56.215	-11.9193
56.215	56.31	-11.6103
56.31	56.405	-12.5851
56.405	56.5028	-12.5208
56.5028	56.6006	-14.3945
56.6006	56.6983	-14.0732
56.6983	56.7961	-13.7005
56.7961	56.8939	-13.2698
56.8939	56.9917	-13.1869
56.9917	57.0894	-14.6233
57.0894	57.1872	-12.3703
57.1872	57.285	-13.1405
57.285	57.3836	-13.4787
57.3836	57.4821	-12.5138
57.4821	57.5807	-12.794
57.5807	57.6793	-14.294
57.6793	57.7779	-12.8292
57.7779	57.8764	-12.11
57.8764	57.975	-13.2357
57.975	58.067	-14.0381
58.067	58.159	-10.5831
58.159	58.251	-9.32317
58.251	58.343	-8.76879
58.343	58.435	-8.68126
58.435	58.535	-14.0723
58.535	58.635	-12.2788
58.635	58.735	-13.2861
58.735	58.835	-13.4046
58.835	58.935	-11.1457
58.935	59.035	-10.5229
59.035	59.137	-11.968
59.137	59.239	-13.7073
59.239	59.341	-13.0248
59.341	59.443	-12.2919
59.443	59.545	-13.2474
59.545	59.645	-8.36143
59.645	59.745	-14.0602
59.745	59.845	-14.43
59.845	59.945	-13.5946
59.945	60.045	-14.1563
60.045	60.145	-12.3746
60.145	60.245	-14.3657
60.245	60.345	-18.0755
60.345	60.435	-13.5373
60.435	60.525	-12.1419
60.525	60.615	-12.8797
60.615	60.705	-12.123
60.705	60.795	-11.2939
60.795	60.885	-11.6644
60.885	60.9779	-12.028
60.9779	61.0707	-14.0477
61.0707	61.1636	-12.7903
61.1636	61.2564	-17.2969
61.2564	61.3493	-12.3766
61.3493	61.4421	-11.9961
61.4421	61.535	-11.0161
61.535	61.6383	-11.4109
61.6383	61.7417	-13.9507
61.7417	61.845	-15.9541
61.845	61.9483	-15.2868
61.9483	62.0517	-13.737
62.0517	62.155	-13.3725
62.155	62.2579	-13.7818
62.2579	62.3607	-15.1778
62.3607	62.4636	-14.0961
62.4636	62.5664	-10.1578
62.5664	62.6693	-8.10978
62.6693	62.7721	-11.2945
62.7721	62.875	-11.6723
62.875	62.9687	-13.7302
62.9687	63.0625	-14.4854
63.0625	63.1562	-13.9599
63.1562	63.25	-15.2177
63.25	63.3437	-14.4199
63.3437	63.4375	-12.2377
63.4375	63.5312	-14.3627
63.5312	63.625	-14.3439
63.625	63.7307	-14.7961
63.7307	63.8364	-15.1545
63.8364	63.9421	-13.4228
63.9421	64.0479	-13.3507
64.0479	64.1536	-11.3705
64.1536	64.2593	-13.741
64.2593	64.365	-9.94781
64.365	64.4621	-10.6929
64.4621	64.5593	-12.0419
64.5593	64.6564	-11.8408
64.6564	64.7536	-11.6927
64.7536	64.8507	-14.2856
64.8507	64.9479	-15.5798
64.9479	65.045	-14.2474
65.045	65.1479	-13.2445
65.1479	65.2507	-13.3412
65.2507	65.3536	-17.5736
65.3536	65.4564	-16.3852
65.4564	65.5593	-11.1455
65.5593	65.6621	-16.1817
65.6621	65.765	-12.6209
65.765	65.869	-12.6527
65.869	65.973	-14.3342
65.973	66.077	-14.2257
66.077	66.181	-13.8046
66.181	66.285	-14.532
66.285	66.385	-15.2479
66.385	66.485	-16.0205
66.485	66.585	-13.0792
66.585	66.685	-12.8629
66.685	66.785	-14.4559
66.785	66.885	-18.3801
66.885	66.985	-9.04724
66.985	67.0787	-8.7275
67.0787	67.1725	-9.43594
67.1725	67.2662	-11.2685
67.2662	67.36	-13.4599
67.36	67.4537	-17.2527
67.4537	67.5475	-15.3687
67.5475	67.6412	-16.0373
67.6412	67.735	-14.4869
67.735	67.845	-12.7456
67.845	67.955	-13.4034
67.955	68.065	-16.2185
68.065	68.175	-17.1948
68.175	68.2779	-16.8427
68.2779	68.3807	-14.4943
68.3807	68.4836	-15.2238
68.4836	68.5864	-15.0566
68.5864	68.6893	-16.9466
68.6893	68.7921	-16.0184
68.7921	68.895	-13.97
68.895	68.9912	-15.6872
68.9912	69.0875	-16.087
69.0875	69.1837	-18.8013
69.1837	69.28	-17.098
69.28	69.3762	-14.7173
69.3762	69.4725	-13.1158
69.4725	69.5687	-15.0785
69.5687	69.665	-14.2869
69.665	69.7612	-11.1156
69.7612	69.8575	-8.37022
69.8575	69.9537	-10.2872
69.9537	70.05	-11.3221
70.05	70.1462	-9.03381
70.1462	70.2425	-8.43575
70.2425	70.3387	-9.59082
70.3387	70.435	-11.7868
70.435	70.5293	-13.944
70.5293	70.6236	-18.2516
70.6236	70.7179	-15.5929
70.7179	70.8121	-14.6324
70.8121	70.9064	-13.0776
70.9064	71.0007	-15.8971
71.0007	71.095	-13.9894
71.095	71.195	-12.6248
71.195	71.295	-11.4207
71.295	71.395	-11.191
71.395	71.495	-11.0103
71.495	71.595	-11.1434
71.595	71.695	-11.0375
71.695	71.795	-11.3413
71.795	71.895	-9.60936
71.895	71.9908	-10.1685
71.9908	72.0867	-12.562
72.0867	72.1825	-12.6879
72.1825	72.2783	-10.3172
72.2783	72.3742	-9.73294
72.3742	72.47	-13.5541
72.47	72.5679	-17.1241
72.5679	72.6657	-15.2867
72.6657	72.7636	-11.8177
72.7636	72.8614	-10.2103
72.8614	72.9593	-16.7438
72.9593	73.0571	-15.8187
73.0571	73.155	-14.0651
73.155	73.26	-14.3079
73.26	73.365	-15.7678
73.365	73.47	-15.6807
73.47	73.575	-15.3925
73.575	73.68	-17.3556
73.68	73.785	-16.4977
73.785	73.8862	-16.6284
73.8862	73.9875	-22.0671
73.9875	74.0887	-14.4983
74.0887	74.19	-15.3714
74.19	74.2912	-16.4683
74.2912	74.3925	-14.7584
74.3925	74.4937	-14.0813
74.4937	74.595	-14.5877
74.595	74.687	-17.864
74.687	74.779	-15.9669
74.779	74.871	-16.735
74.871	74.963	-17.0489
74.963	75.055	-14.0213
75.055	75.155	-15.209
75.155	75.255	-8.90373
75.255	75.355	-11.9047
75.355	75.455	-9.52465
75.455	75.555	-10.1812
75.555	75.655	-15.2931
75.655	75.7567	-14.3443
75.7567	75.8583	-13.3852
75.8583	75.96	-14.8366
75.96	76.0617	-12.5162
76.0617	76.1633	-14.4341
76.1633	76.265	-15.7792
76.265	76.3717	-12.3434
76.3717	76.4783	-13.1932
76.4783	76.585	-14.7469
76.585	76.6917	-13.709
76.6917	76.7983	-13.2889
76.7983	76.905	-13.9189
76.905	77.0064	-12.8168
77.0064	77.1079	-11.9497
77.1079	77.2093	-11.424
77.2093	77.3107	-13.4958
77.3107	77.4121	-13.1783
77.4121	77.5136	-11.1231
77.5136	77.615	-11.5091
77.615	77.7183	-10.5943
77.7183	77.8217	-12.6754
77.8217	77.925	-12.4344
77.925	78.0283	-11.3959
78.0283	78.1317	-15.5468
78.1317	78.235	-18.5964
78.235	78.343	-13.604
78.343	78.451	-12.7092
78.451	78.559	-14.5126
78.559	78.667	-13.2747
78.667	78.775	-15.5844
78.775	78.8736	-16.4683
78.8736	78.9721	-17.7029
78.9721	79.0707	-10.4146
79.0707	79.1693	-9.50933
79.1693	79.2679	-13.1859
79.2679	79.3664	-14.3284
79.3664	79.465	-12.9319
79.465	79.5587	-13.4408
79.5587	79.6525	-17.6263
79.6525	79.7462	-17.4733
79.7462	79.84	-15.6077
79.84	79.9337	-14.8623
79.9337	80.0275	-15.0333
80.0275	80.1212	-14.2126
80.1212	80.215	-16.2189
80.215	80.3183	-11.4792
80.3183	80.4217	-11.8614
80.4217	80.525	-13.8129
80.525	80.6283	-15.9202
80.6283	80.7317	-13.2519
80.7317	80.835	-14.1254
80.835	80.9317	-15.8566
80.9317	81.0283	-17.638
81.0283	81.125	-13.9949
81.125	81.2217	-13.8153
81.2217	81.3183	-13.5286
81.3183	81.415	-16.3567
81.415	81.515	-14.3806
81.515	81.615	-16.2828
81.615	81.715	-12.9716
81.715	81.815	-9.73363
81.815	81.915	-10.2251
81.915	82.015	-13.3493
82.015	82.115	-13.9655
82.115	82.2121	-15.1256
82.2121	82.3093	-13.6453
82.3093	82.4064	-14.1615
82.4064	82.5036	-13.1037
82.5036	82.6007	-14.0876
82.6007	82.6979	-16.9201
82.6979	82.795	-12.8391
82.795	82.8914	-11.9573
82.8914	82.9879	-15.9202
82.9879	83.0843	-13.2519
83.0843	83.1807	-14.1254
83.1807	83.2771	-15.8566
83.2771	83.3736	-17.638
83.3736	83.47	-13.9949
83.47	83.564	-13.8153
83.564	83.658	-13.5286
83.658	83.752	-16.3567
83.752	83.846	-14.3806
83.846	83.94	-16.2828
83.94	84.0362	-12.9716
84.0362	84.1325	-9.73363
84.1325	84.2287	-10.2251
84.2287	84.325	-13.3493
84.325	84.4212	-13.9655
84.4212	84.5175	-15.1256
84.5175	84.6137	-13.6453
84.6137	84.71	-14.1615
84.71	84.815	-13.1037
84.815	84.92	-14.0876
84.92	85.025	-16.9201
85.025	85.13	-12.8391
85.13	85.2333	-11.9573
85.2333	85.3367	-12.7182
85.3367	85.44	-17.1473
85.44	85.5433	-19.5949
85.5433	85.6467	-15.5748
85.6467	85.75	-13.0619
85.75	85.848	-15.8749
85.848	85.946	-13.4167
85.946	86.044	-12.8621
86.044	86.142	-9.92139
86.142	86.24	-10.2819
86.24	86.3533	-11.8791
86.3533	86.4667	-9.69407
86.4667	86.58	-11.4503
86.58	86.67
86.67	86.76	-14.7037
86.76	86.85	-12.6302
86.85	86.94	-14.6225
86.94	87.0407	-13.3083
87.0407	87.1414	-12.3599
87.1414	87.2421	-12.5403
87.2421	87.3429	-15.3911
87.3429	87.4436	-19.8989
87.4436	87.5443	-14.5323
87.5443	87.645	-16.2749
87.645	87.7433	-10.8349
87.7433	87.8417	-10.9722
87.8417	87.94	-10.4677
87.94	88.0383	-9.6049
88.0383	88.1367	-10.544
88.1367	88.235	-10.4371
88.235	88.3333	-11.7611
88.3333	88.4317	-14.0415
88.4317	88.53	-12.5796
88.53	88.6283	-14.0102
88.6283	88.7267	-13.5303
88.7267	88.825	-15.4554
88.825	88.93	-17.0828
88.93	89.035	-10.5203
89.035	89.14	-13.3901
89.14	89.245	-12.6216
89.245	89.35	-10.8856
89.35	89.455	-13.4877
89.455	89.56	-10.3492
89.56	89.6525	-9.0418
89.6525	89.745	-9.99751
89.745	89.8375	-10.0371
89.8375	89.93	-11.0681
89.93	90.0225	-13.1317
90.0225	90.115	-13.2379
90.115	90.209	-14.2461
90.209	90.303	-15.7998
90.303	90.397	-14.3017
90.397	90.491	-12.6492
90.491	90.585	-12.4841
90.585	90.6858	-10.2602
90.6858	90.7867	-9.79503
90.7867	90.8875	-10.3957
90.8875	90.9883	-10.9594
90.9883	91.0892	-13.3516
91.0892	91.19	-12.2512
91.19	91.2817	-15.1762
91.2817	91.3733
91.3733	91.465	-12.7307
91.465	91.5567	-11.2828
91.5567	91.6483	-13.0515
91.6483	91.74	-14.6128
91.74	91.843	-12.4272
91.843	91.946	-15.5645
91.946	92.049	-13.0319
92.049	92.152	-12.1137
92.152	92.255	-10.8619
92.255	92.3579	-12.7462
92.3579	92.4607	-13.5149
92.4607	92.5636	-10.1732
92.5636	92.6664	-10.3876
92.6664	92.7693	-10.5992
92.7693	92.8721	-10.5212
92.8721	92.975	-12.8416
92.975	93.067	-15.0239
93.067	93.159	-13.7792
93.159	93.251	-15.0319
93.251	93.343	-11.9249
93.343	93.435	-11.8146
93.435	93.5383	-13.4676
93.5383	93.6417	-10.9249
93.6417	93.745	-13.8956
93.745	93.8483	-15.3546
93.8483	93.9517	-14.6476
93.9517	94.055	-14.2229
94.055	94.1586	-13.0922
94.1586	94.2621	-12.8266
94.2621	94.3657	-16.9532
94.3657	94.4693	-13.4249
94.4693	94.5729	-14.8946
94.5729	94.6764	-16.1036
94.6764	94.78	-15.2911
94.78	94.875	-13.1401
94.875	94.97	-13.9067
94.97	95.065	-13.491
95.065	95.16	-13.2448
95.16	95.255	-14.5118
95.255	95.35	-13.1158
95.35	95.445	-9.46021
95.445	95.54	-12.9902
95.54	95.648	-12.1033
95.648	95.756	-10.5711
95.756	95.864	-10.8403
95.864	95.972	-13.3332
95.972	96.08	-10.6748
96.08	96.18	-12.8168
96.18	96.28	-13.8705
96.28	96.38	-11.8607
96.38	96.48	-9.81644
96.48	96.58	-9.81777
96.58	96.68	-14.5285
96.68	96.78	-16.5867
96.78	96.8857	-16.8625
96.8857	96.9914	-16.7542
96.9914	97.0971	-13.2109
97.0971	97.2029	-16.2874
97.2029	97.3086	-14.0912
97.3086	97.4143	-14.6004
97.4143	97.52	-14.4928
97.52	97.6217	-13.0676
97.6217	97.7233	-14.0222
97.7233	97.825	-14.441
97.825	97.9267	-11.8482
97.9267	98.0283	-17.7398
98.0283	98.13	-15.3946
98.13	98.239	-14.9601
98.239	98.348	-9.1021
98.348	98.457	-10.12
98.457	98.566	-12.1104
98.566	98.675	-14.6647
98.675	98.7712	-14.8977
98.7712	98.8675	-13.8264
98.8675	98.9637	-13.5967
98.9637	99.06	-12.0703
99.06	99.1562	-11.7045
99.1562	99.2525	-11.8788
99.2525	99.3487	-11.7364
99.3487	99.445	-15.4464
99.445	99.5393	-12.0617
99.5393	99.6336	-11.4597
99.6336	99.7279	-12.5155
99.7279	99.8221	-16.3622
99.8221	99.9164	-12.549
99.9164	100.011	-12.4306
100.011	100.105	-14.1412
100.105	100.197	-12.8941
100.197	100.289	-14.2365
100.289	100.381	-13.5272
100.381	100.473	-14.3455
100.473	100.565	-13.3068
100.565	100.662	-14.3218
100.662	100.759	-10.3594
100.759	100.856	-12.2262
100.856	100.954	-18.0865
100.954	101.051	-16.4702
101.051	101.148	-16.1003
101.148	101.245	-11.8303
101.245	101.352	-10.522
101.352	101.458	-12.4125
101.458	101.565	-12.1406
101.565	101.665	-14.9752
101.665	101.765	-15.6763
101.765	101.865	-17.4134
101.865	101.969	-13.4924
101.969	102.072	-14.985
102.072	102.176	-14.9709
102.176	102.28	-11.3204
102.28	102.378	-12.375
102.378	102.476	-16.2548
102.476	102.574	-12.4069
102.574	102.671	-12.3148
102.671	102.769	-14.0928
102.769	102.867	-12.908
102.867	102.965	-14.265
102.965	103.067	-13.4127
103.067	103.168	-14.2894
103.168	103.27	-13.2715
103.27	103.372	-14.1368
103.372	103.473	-10.2596
103.473	103.575	-12.1752
103.575	103.665	-17.9729
103.665	103.755	-16.2733
103.755	103.845	-15.8721
103.845	103.935	-11.6553
103.935	104.025	-10.4178
104.025	104.132	-12.4141
104.132	104.24	-12.0435
104.24	104.347	-13.5536
104.347	104.455	-14.9044
104.455	104.562	-14.9782
104.562	104.669	-13.5723
104.669	104.776	-11.7777
104.776	104.883	-11.0534
104.883	104.99	-14.123
104.99	105.082	-14.1339
105.082	105.175	-13.0258
105.175	105.267	-16.6395
105.267	105.36	-11.673
105.36	105.466	-13.1023
105.466	105.572	-12.182
105.572	105.678	-11.8568
105.678	105.784	-17.4671
105.784	105.89	-11.6863
105.89	105.992	-12.7159
105.992	106.095	-13.0984
106.095	106.197	-13.7726
106.197	106.3	-13.1474
106.3	106.396	-14.1833
106.396	106.492	-15.8848
106.492	106.589	-13.0858
106.589	106.685	-15.1728
106.685	106.781	-15.4768
106.781	106.877	-14.8572
106.877	106.974	-15.1374
106.974	107.07	-13.6471
107.07	107.174	-12.909
107.174	107.278	-12.3122
107.278	107.382	-12.4913
107.382	107.486	-10.8916
107.486	107.59	-16.5436
107.59	107.682	-16.1243
107.682	107.775	-14.2717
107.775	107.867	-17.8213
107.867	107.96	-12.0326
107.96	108.063	-12.6995
108.063	108.166	-11.8696
108.166	108.269	-11.492
108.269	108.371	-14.7732
108.371	108.474	-14.2029
108.474	108.577	-14.9028
108.577	108.68	-13.5954
108.68	108.785	-14.3749
108.785	108.89	-10.2227
108.89	108.995	-9.89071
108.995	109.1	-9.46104
109.1	109.197	-11.1736
109.197	109.295	-12.0578
109.295	109.392	-11.545
109.392	109.49	-10.0212
109.49	109.587	-12.433
109.587	109.685	-10.8232
109.685	109.782	-11.0424
109.782	109.88	-10.1569
109.88	109.98	-13.2605
109.98	110.08	-14.4694
110.08	110.18	-8.24728
110.18	110.28	-9.73819
110.28	110.38	-11.3382
110.38	110.48	-12.2424
110.48	110.58	-10.1431
110.58	110.676	-9.93671
110.676	110.772	-11.0001
110.772	110.869	-13.408
110.869	110.965	-14.9922
110.965	111.061	-12.0429
111.061	111.157	-11.1112
111.157	111.254	-11.3687
111.254	111.35	-11.9033
111.35	111.448	-12.1775
111.448	111.546	-11.3883
111.546	111.643	-12.2296
111.643	111.741	-11.3097
111.741	111.839	-12.9162
111.839	111.937	-13.1053
111.937	112.034	-11.0642
112.034	112.132	-13.0332
112.132	112.23	-11.3298
112.23	112.323	-12.0588
112.323	112.416	-10.8935
112.416	112.509	-10.8952
112.509	112.601	-10.9307
112.601	112.694	-11.0112
112.694	112.787	-11.5595
112.787	112.88	-10.4854
112.88	112.979	-8.76479
112.979	113.077	-9.3922
113.077	113.176	-10.369
113.176	113.275	-11.5373
113.275	113.374	-10.6276
113.374	113.472	-13.1721
113.472	113.571	-10.4854
113.571	113.67	-11.6399
113.67	113.766	-11.0182
113.766	113.862	-12.4612
113.862	113.959	-10.366
113.959	114.055	-10.5498
114.055	114.151	-10.9464
114.151	114.247	-10.9852
114.247	114.344	-10.2798
114.344	114.44	-10.7854
114.44	114.54	-12.1517
114.54	114.64	-10.5846
114.64	114.74	-9.88432
114.74	114.84	-11.1153
114.84	114.94	-11.2138
114.94	115.04	-11.2737
115.04	115.14	-11.4847
115.14	115.238	-11.706
115.238	115.337	-10.9803
115.337	115.435	-9.79304
115.435	115.533	-10.3632
115.533	115.632	-11.3578
115.632	115.73	-11.8661
115.73	115.828	-11.1753
115.828	115.927	-11.1303
115.927	116.025	-10.18
116.025	116.125	-9.57788
116.125	116.225	-10.1295
116.225	116.325	-10.1546
116.325	116.425	-12.1983
116.425	116.525	-9.888
116.525	116.625	-10.1473
116.625	116.726	-11.0179
116.726	116.826	-11.6028
116.826	116.927	-10.1504
116.927	117.027	-10.7909
117.027	117.128	-11.6961
117.128	117.229	-12.4419
117.229	117.329	-12.0357
117.329	117.43	-11.8008
117.43	117.536	-10.0204
117.536	117.642	-10.3391
117.642	117.748	-12.6817
117.748	117.854	-10.6674
117.854	117.96	-9.39334
117.96	118.059	-13.5128
118.059	118.158	-9.85026
118.158	118.257	-13.0442
118.257	118.357	-10.2825
118.357	118.456	-8.25036
118.456	118.555	-9.48047
118.555	118.652	-9.63107
118.652	118.75	-9.84134
118.75	118.847	-10.736
118.847	118.945	-10.7992
118.945	119.042	-10.4857
119.042	119.14	-11.951
119.14	119.237	-10.4144
119.237	119.335	-10.829
119.335	119.443	-11.6389
119.443	119.551	-10.2526
119.551	119.659	-9.38728
119.659	119.767	-10.3458
119.767	119.875	-11.2384
119.875	119.98	-11.0959
119.98	120.085	-10.8799
120.085	120.19	-11.4843
120.19	120.295	-11.7738
120.295	120.4	-11.7357
120.4	120.505	-11.2911
120.505	120.61	-11.3754
120.61	120.715	-10.2684
120.715	120.82	-10.3204
120.82	120.925	-11.5859
120.925	121.03	-11.0626
121.03	121.135	-11.0341
121.135	121.24	-11.2551
121.24	121.345	-10.6223
121.345	121.451	-9.37216
121.451	121.557	-9.78526
121.557	121.663	-10.2429
121.663	121.769	-13.4637
121.769	121.875	-10.5492
121.875	121.971	-9.51836
121.971	122.067	-9.92644
122.067	122.164	-8.78867
122.164	122.26	-8.67291
122.26	122.356	-9.39098
122.356	122.452	-10.4655
122.452	122.549	-10.6501
122.549	122.645	-10.0099
122.645	122.748	-9.63849
122.748	122.851	-9.90459
122.851	122.954	-11.3835
122.954	123.056	-9.42587
123.056	123.159	-9.04205
123.159	123.262	-9.83154
123.262	123.365	-11.5485
123.365	123.464	-10.3467
123.464	123.562	-10.7113
123.562	123.661	-10.7027
123.661	123.76	-11.0038
123.76	123.859	-10.3326
123.859	123.957	-10.9086
123.957	124.056	-10.2281
124.056	124.155	-9.45075
124.155	124.251	-9.35591
124.251	124.347	-9.61856
124.347	124.443	-9.42024
124.443	124.539	-9.99231
124.539	124.635	-10.4592
124.635	124.732	-10.8045
124.732	124.828	-10.3496
124.828	124.925	-10.1484
124.925	125.022	-10.5331
125.022	125.118	-11.58
125.118	125.215	-10.5005
125.215	125.312	-10.5314
125.312	125.408	-10.4675
125.408	125.505	-11.5112
125.505	125.607	-10.7261
125.607	125.709	-11.4559
125.709	125.811	-10.3892
125.811	125.913	-10.6111
125.913	126.014	-10.841
126.014	126.116	-12.0655
126.116	126.218	-11.6538
126.218	126.32	-10.7709
126.32	126.426	-11.1101
126.426	126.532	-10.5785
126.532	126.638	-10.6826
126.638	126.744	-10.0381
126.744	126.85	-10.386
126.85	126.943	-10.8974
126.943	127.036	-12.2046
127.036	127.129	-11.4485
127.129	127.221	-11.6387
127.221	127.314	-10.8885
127.314	127.407	-9.8946
127.407	127.5	-9.56978
127.5	127.59	-10.386
127.59	127.68	-10.5314
127.68	127.77	-10.505
127.77	127.86	-11.3245
127.86	127.95	-11.1823
127.95	128.04	-11.3914
128.04	128.13	-10.7299
128.13	128.22	-10.937
128.22	128.31	-9.79765
128.31	128.4	-8.87562
128.4	128.49	-8.31436
128.49	128.58	-9.04578
128.58	128.67	-10.4315
128.67	128.76	-10.4038
128.76	128.85	-9.94176
128.85	128.94	-9.40852
128.94	129.03	-10.9166
129.03	129.13	-9.58004
129.13	129.23	-10.4928
129.23	129.33	-10.5448
129.33	129.43	-10.5811
129.43	129.53	-10.0364
129.53	129.63	-9.91917
129.63	129.73	-10.4145
129.73	129.83	-9.8682
129.83	129.93	-10.0861
129.93	130.03	-9.84921
130.03	130.13	-10.4878
130.13	130.23	-10.2147
130.23	130.33	-10.1617
130.33	130.43	-10.3226
130.43	130.524	-10.4259
130.524	130.619	-10.9912
130.619	130.713	-10.8323
130.713	130.807	-11.0738
130.807	130.901	-11.1308
130.901	130.996	-10.765
130.996	131.09	-10.3109
131.41	131.5	-10.3272
131.5	131.6	-10.4764
131.6	131.7	-10.2213
131.7	131.8	-10.2054
131.8	131.9	-10.3777
131.9	132	-10.5778
132	132.1	-10.6667
132.1	132.19	-10.6548
132.19	132.28	-10.7813
132.28	132.37	-10.4062
132.37	132.46	-10.8688
132.46	132.55	-11.0886
132.55	132.65	-11.2962
132.65	132.746	-11.0781
132.746	132.842	-11.6933
132.842	132.938	-10.9244
132.938	133.034	-10.5256
133.034	133.131	-10.4995
133.131	133.227	-10.4257
133.227	133.323	-10.6501
133.323	133.419	-10.7219
133.419	133.515	-10.5696
133.515	133.615	-11.3671
133.615	133.715	-11.2857
133.715	133.815	-11.4326
133.815	133.915	-11.5281
133.915	134.015	-11.4156
134.015	134.115	-11.48
134.115	134.215	-11.3441
134.215	134.315	-11.1287
134.315	134.349	-11.1831
134.349	134.384	-11.2813
134.384	134.418	-11.2095
134.418	134.452	-11.2867
134.452	134.486	-11.296
134.486	134.521	-11.0218
134.521	134.555	-11.3469
134.555	134.589	-11.4722
134.589	134.624	-11.6491
134.624	134.658	-11.5874
134.658	134.692	-11.5558
134.692	134.726	-11.5255
134.726	134.761	-11.4718
134.761	134.795	-11.4665
134.795	134.829	-11.8067
134.829	134.864	-11.9283
134.864	134.898	-11.9619
134.898	134.932	-12.0769
134.932	134.966	-11.9756
134.966	135.001	-11.8543
135.001	135.035	-11.4229
135.035	135.044	-11.4361
135.044	135.052	-11.3702
135.052	135.061	-11.3949
135.061	135.069	-11.5127
135.069	135.078	-11.4749
135.078	135.086	-11.5164
135.086	135.095	-11.592
135.095	135.103	-11.5445
135.103	135.112	-11.6252
135.112	135.12	-11.5472
135.12	135.129	-11.9963
135.129	135.137	-12.0204
135.137	135.146	-12.0023
135.146	135.155	-11.755
135.155	135.163	-11.6958
135.163	135.172	-11.7031
135.172	135.18	-11.7841
135.18	135.189	-11.6546
135.189	135.197	-11.5505
135.197	135.206	-11.3687
135.206	135.214	-11.6177
135.214	135.223	-11.732
135.223	135.231	-11.8408
135.231	135.24	-12.0151
135.24	135.248	-11.9948
135.248	135.257	-12.2957
135.257	135.265	-12.1808
135.265	135.274	-11.8662
135.274	135.283	-12.0543
135.283	135.291	-12.2208
135.291	135.3	-12.402
135.3	135.308	-12.3051
135.308	135.317	-12.0526
135.317	135.325	-11.9812
135.325	135.334	-12.0042
135.334	135.342	-12.0568
135.342	135.351	-11.8391
135.351	135.359	-11.8885
135.359	135.368	-11.7583
135.368	135.376	-12.2829
135.376	135.385	-11.6259
135.385	135.396	-12.1029
135.396	135.406	-12.0531
135.406	135.417	-12.0037
135.417	135.427	-12.0815
135.427	135.438	-12.1864
135.438	135.448	-12.2484
135.448	135.459	-11.9512
135.459	135.469	-11.8259
135.469	135.48	-11.7521
135.48	135.49	-11.8546
135.49	135.501	-12.0063
135.501	135.511	-11.8853
135.511	135.522	-12.1564
135.522	135.532	-12.0977
135.532	135.543	-12.0446
135.543	135.553	-11.9925
135.553	135.564	-12.222
135.564	135.574	-12.409
135.574	135.585	-12.3008
